# Supplementary material for: Future Changes in High and Low Flows under the Impacts of Climate and Land Use Changes in the Jiulong River Basin of Southeast China
Source: MDPI journal article supplement (doi:10.3390/atmos13020150), 2022-01-18
Supplement: s1 [file s1]

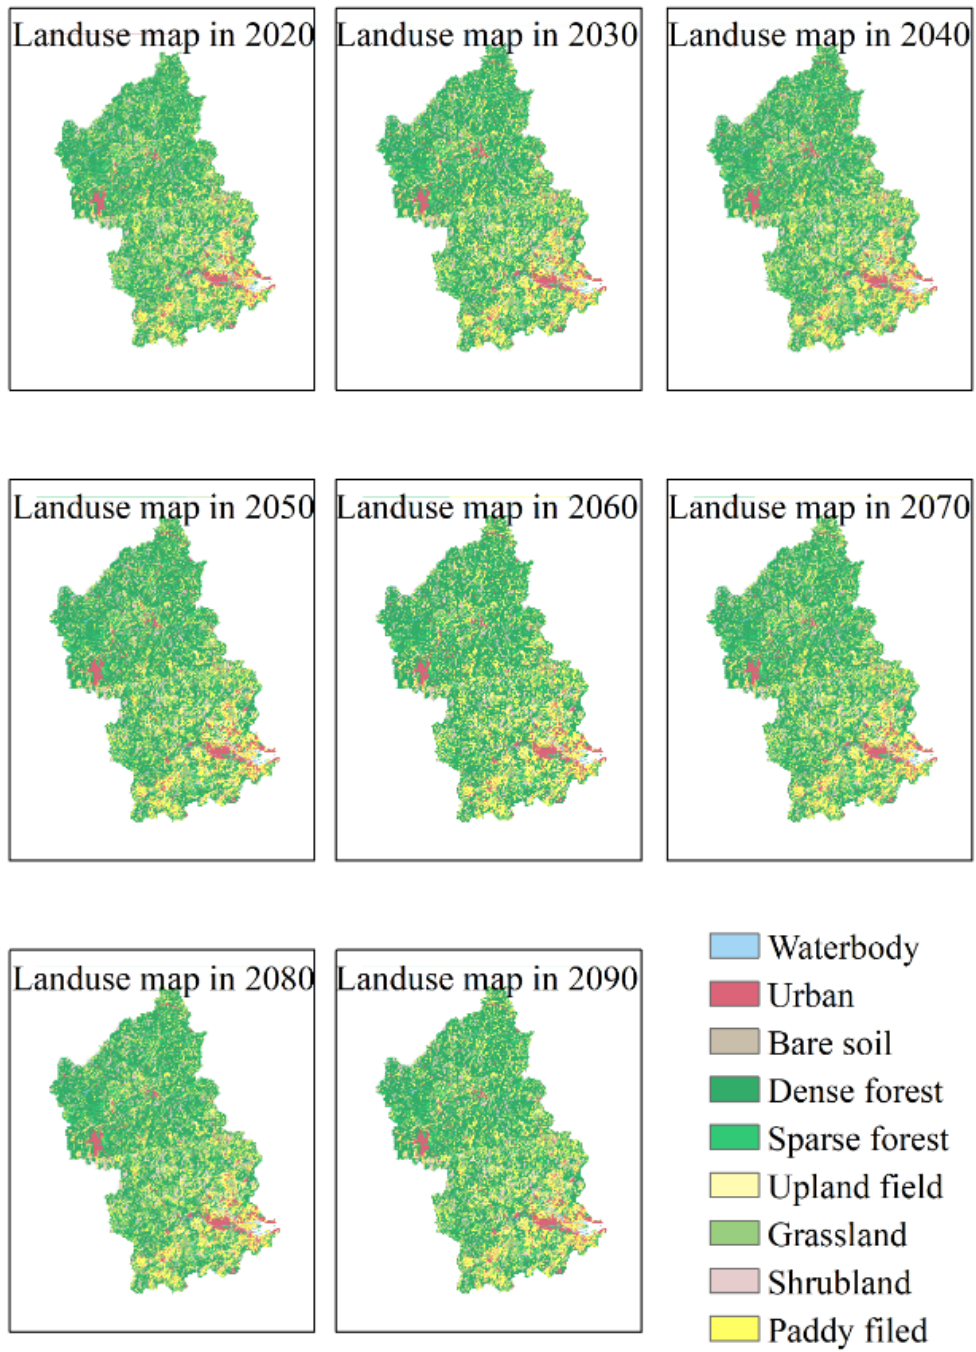

**Figure S1.** The projected land use maps under SSP126.

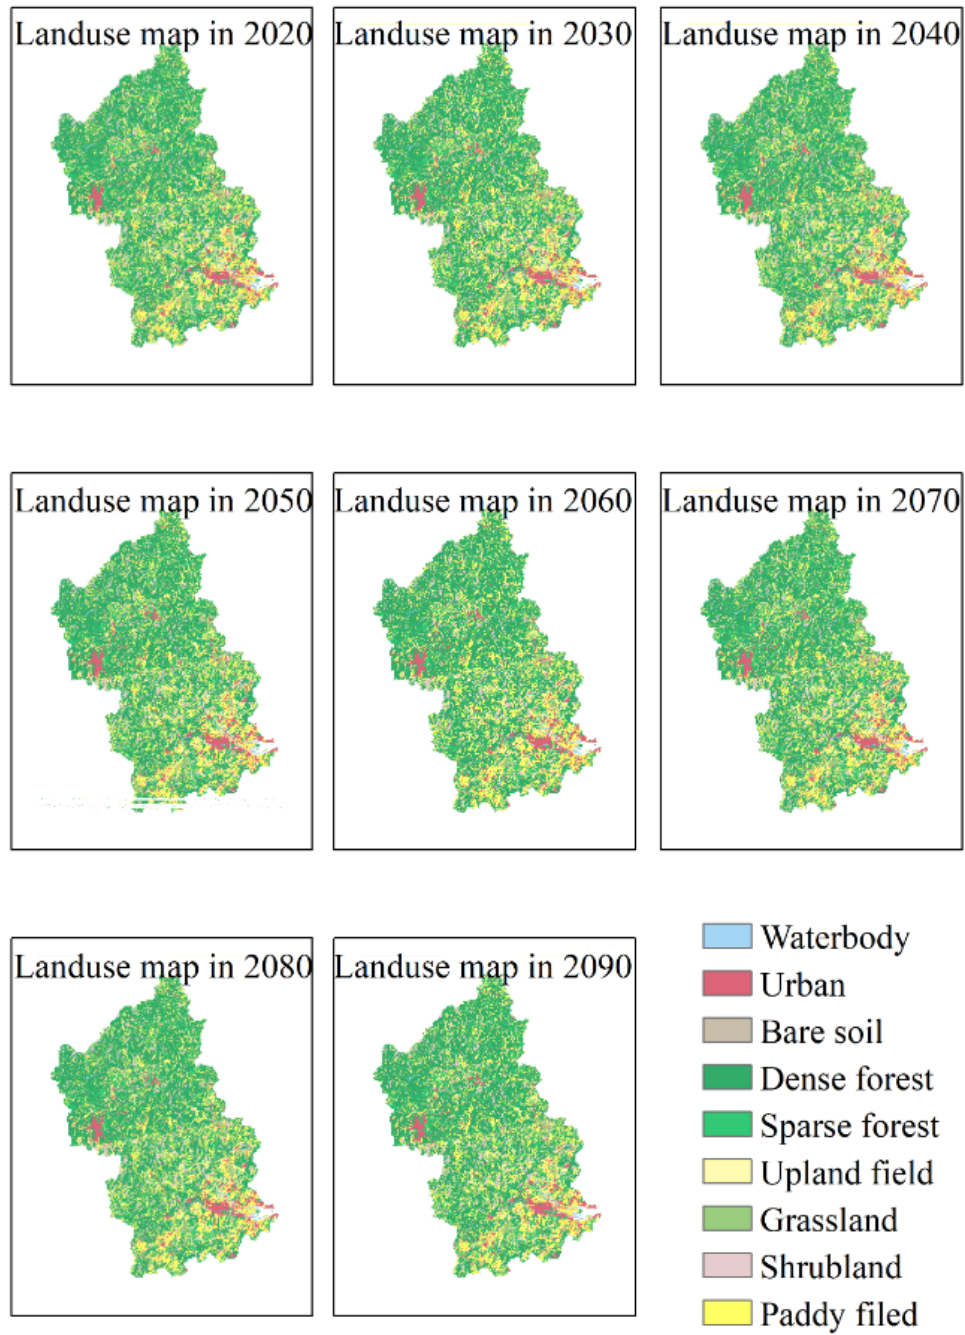

**Figure S2.** The projected land use maps under SSP245.

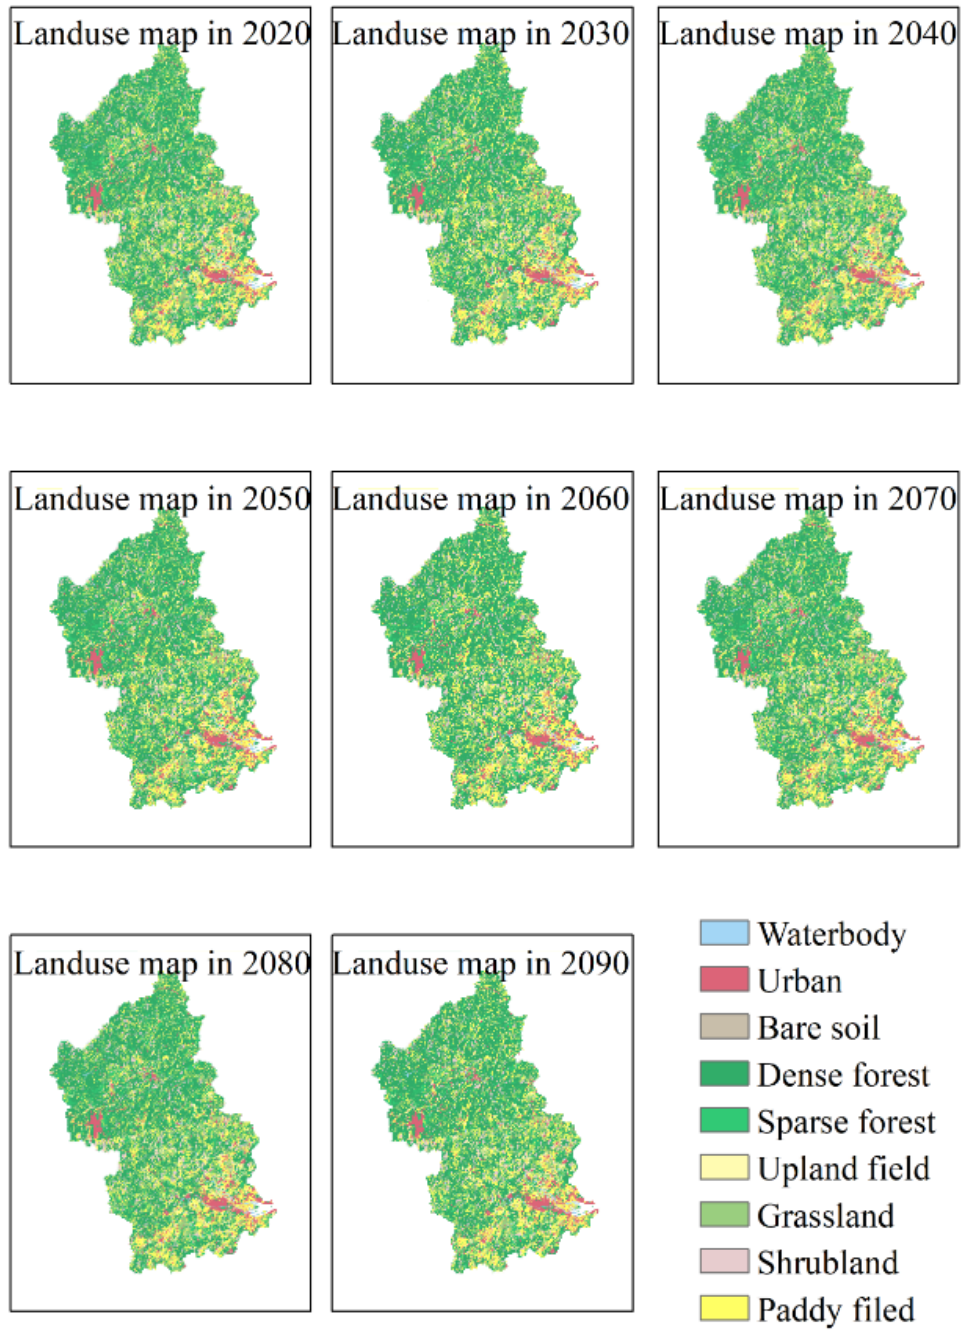

**Figure S3.** The projected land use maps under SSP370.

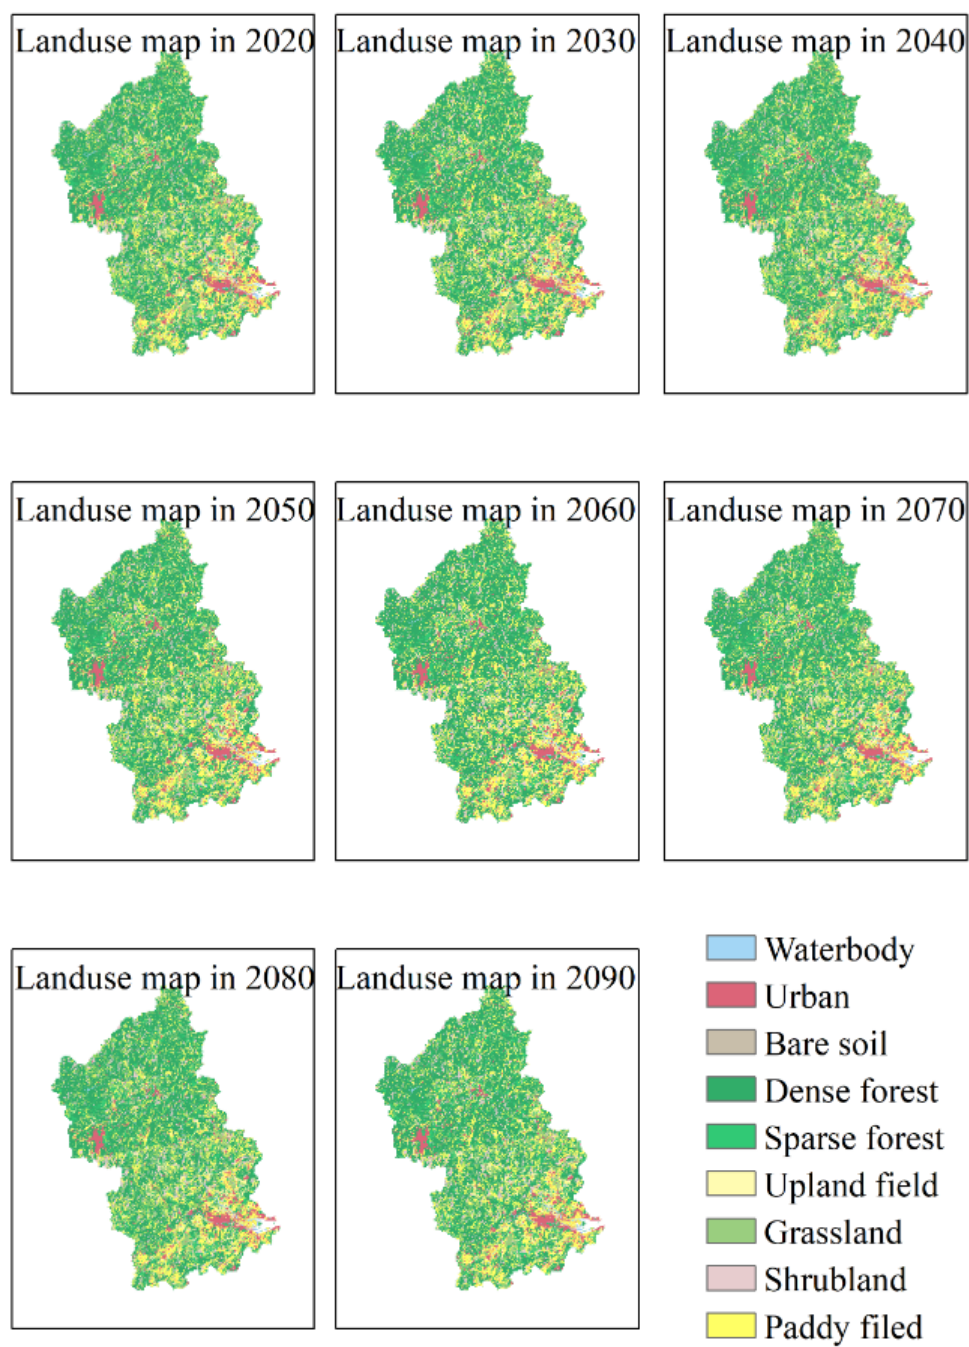

**Figure S4.** The projected land use maps under SSP585.
